Public Health Report

## Green Tea Consumption and Gastric Cancer Risk: An Evaluation Based on a Systematic Review of Epidemiologic Evidence Among the Japanese Population

Shizuka Sasazuki<sup>1,\*</sup>, Akiko Tamakoshi<sup>2</sup>, Keitaro Matsuo<sup>3</sup>, Hidemi Ito<sup>3</sup>, Kenji Wakai<sup>4</sup>, Chisato Nagata<sup>5</sup>, Tetsuya Mizoue<sup>6</sup>, Keitaro Tanaka<sup>7</sup>, Ichiro Tsuji<sup>8</sup>, Manami Inoue<sup>1</sup> and Shoichiro Tsugane<sup>1</sup> for the Research Group for the Development and Evaluation of Cancer Prevention Strategies in Japan

<sup>1</sup>Epidemiology and Prevention Division, Research Center for Cancer Prevention and Screening, National Cancer Center, Tokyo, <sup>2</sup>Department of Public Health, Aichi Medical University School of Medicine, Nagakute, <sup>3</sup>Division of Epidemiology and Prevention, Aichi Cancer Center Research Institute, <sup>4</sup>Department of Preventive Medicine, Nagoya University Graduate School of Medicine, Nagoya, <sup>5</sup>Department of Epidemiology and Preventive Medicine, Gifu University Graduate School of Medicine, Gifu, <sup>6</sup>Department of Epidemiology and International Health, Research Institute, International Medical Center of Japan, Tokyo, <sup>7</sup>Department of Preventive Medicine, Saga Medical School, Faculty of Medicine, Saga University, Saga and <sup>8</sup>Division of Epidemiology, Department of Public Health and Forensic Medicine, Tohoku University Graduate School of Medicine, Sendai, Japan

\*For reprints and all correspondence: Shizuka Sasazuki, Epidemiology and Prevention Division, Research Center for Cancer Prevention and Screening, National Cancer Center, 5-1-1 Tsukiji Chuo-ku, Tokyo 104-0045 Japan.  
E-mail: ssasazuk@ncc.go.jp

Received October 19, 2011; accepted January 24, 2012

**Objective:** Numerous *in vitro* and animal studies have shown that green tea has a protective effect against cancer. However, results from epidemiologic studies are conflicting. We evaluated the association between green tea consumption and risk for gastric cancer risk among the Japanese population based on a systematic review of epidemiologic evidence.

**Methods:** Original data were obtained from MEDLINE searches using PubMed or from searches of the *Ichushi* database, complemented with manual searches. Evaluation of associations was based on the strength of evidence and the magnitude of association, together with biologic plausibility.

**Results:** Eight cohort studies and three case–control studies were identified. Overall, we found no preventive effect on gastric cancer for green tea intake in cohort studies. However, a small, consistent risk reduction limited to women was observed, which was confirmed by pooling data of six cohort studies (hazard ratio = 0.79, 95% confidence interval 0.65–0.96 with  $\geq 5$  cups/day of green tea intake). Case–control studies consistently showed a weak inverse association between green tea intake and gastric cancer risk.

**Conclusions:** We conclude that green tea possibly decreases the risk of gastric cancer in women. However, epidemiologic evidence is still insufficient to demonstrate any association in men.

*Key words:* systematic review – epidemiology – green tea – gastric cancer – Japanese

## BACKGROUND

Although the age-standardized mortality rate has been continuously declining, gastric cancer is still the second leading cause of cancer deaths among men and women in Japan (1). In addition to *Helicobacter pylori* infection or cigarette smoking, dietary factors are suggested to be associated with gastric carcinogenesis (2).

Numerous *in vitro* and animal studies have shown that green tea has a protective effect against cancer (3). These experimental studies have suggested that green tea polyphenols might have a protective effect against gastric cancer through its apoptosis-inducing, antimutagenic and antioxidant activities. In 1997, a review of the World Cancer Research Fund, based on the results of case–control studies and several animal models that showed a protective effect of green tea, stated that ‘green tea possibly reduce the risk of stomach cancer’ (4). Since then, results from cohort studies generally have not supported the findings from case–control studies, and the more recent 2007 report concluded that ‘the evidence was so limited that no firm conclusion can be made’ (5).

In Japan, green tea is one of the most commonly consumed beverages, and therefore, the effect of green tea on the risk for gastric cancer may be of particular concern. We reviewed epidemiologic studies of green tea consumption and gastric cancer risk among Japanese. This work was conducted as a systematic review of epidemiologic studies on lifestyle factors and cancer based on previous publications targeting Japanese (6).

## METHODS

### RESEARCH REVIEW

Details of the evaluation method have been described previously (6). Briefly, original data for this review were identified through searches of the MEDLINE (PubMed) and *Ichushi (Japana Centra Revuo Medicina)* databases, complemented by manual searches of references from relevant articles where necessary. All epidemiologic studies on the association between green tea intake and gastric cancer incidence/mortality among the Japanese from 1950 (or 1983 for the *Ichushi* database) to June 2011 were identified using the search terms ‘green tea’, ‘tea’, ‘gastric cancer’, ‘stomach cancer’, ‘cancer’, ‘cohort study’, ‘case-control study’, ‘Japan’ and ‘Japanese’ as key words. In addition, we manually searched through references from relevant articles where necessary. Papers written in either English or Japanese were reviewed, and only studies on Japanese populations living in Japan were included. In the case of multiple publications of analyses of the same or overlapping data sets, only data from the largest or the most recent studies were included. The individual results were summarized in the tables separately as cohort or case–control studies. Pooled data of Japanese cohort studies, including some of the individual studies already listed, were also available through the review

process. To better understand the results from individual studies and finally evaluate the evidence for green tea intake and gastric cancer risk in Japanese, findings from recent pooled analyses were also listed and considered in this report.

### EVALUATION OF STRENGTH OF ASSOCIATION BETWEEN GREEN TEA INTAKE AND GASTRIC CANCER RISK

The evaluation was made based on the magnitude of association and the strength of evidence. First, the former was assessed by classifying the relative risk (RR) in each study into the following four categories, while considering statistical significance (SS) or no statistical significance (NS), as strong (symbol  $\downarrow\downarrow\downarrow$  or  $\uparrow\uparrow\uparrow$ ),  $<0.5$  or  $>2.0$  (SS); moderate (symbol  $\downarrow\downarrow$  or  $\uparrow\uparrow$ ), either (i)  $<0.5$  or  $>2.0$  (NS), (ii)  $>1.5-2$  (SS) or (iii)  $0.5$  to  $<0.67$  (SS); weak (symbol  $\downarrow$  or  $\uparrow$ ), either (i)  $>1.5-2$  (NS), (ii)  $0.5$  to  $<0.67$  (NS) or (iii)  $0.67-1.5$  (SS); or no association (symbol  $-$ ),  $0.67-1.5$  (NS). In cases where the frequency or amount of green tea intake had been separated into levels in a study, we used the RR derived from comparing the highest intake with the lowest. To consider the intermediate categories of intake, however, the *P* value for the trend was also considered when judging the statistical significance. After this process, the strength of evidence was evaluated in a manner similar to that used in the WHO/FAO Expert Consultation Report, where evidence was classified as convincing, probable, possible and insufficient (7). We assumed that biologic plausibility was based on evidence in experimental models, human studies and other relevant data.

### MAIN FEATURES AND COMMENTS

Through the review process, we identified eight cohort studies (8–15), one pooled analysis of six cohort studies (16) (Table 1) and three case–control studies (17–19) (Table 2). Among cohort studies, the events followed were death in five studies (8,10,12,14,15) and incidence in the other three studies (9,11,13). Five studies showed the results for men and women separately (9,10–14), whereas three studies showed combined results only (8,13,15). The pooled analysis included four cohorts (9,10 and two cohorts in 11) listed in Table 1 and two other cohorts (20,21). For all case–control studies, the results were shown for men and women combined.

The summary of the magnitudes of association for the cohort study and the case–control study is presented in Tables 3 and 4, respectively. As shown in Table 3, among eight cohort studies, one study showed a weak positive association between green tea intake and gastric cancer risk in men (9). Women in the study and all other studies showed no association at all. When the anatomic subsite was considered, one study observed a moderate inverse association for distal cancer in women (11). On the other hand, case–

**Table 1.** Gastric cancer risk and consumption of green tea in cohort studies of Japanese populations

| References            | Study period | Study population                     |                                     |                |                                 | Category            | No. among cases  | Relative risk (95% CI or P) | P for trend | Confounding variables considered                                                                                                                                                                                                                    | Comments |
|-----------------------|--------------|--------------------------------------|-------------------------------------|----------------|---------------------------------|---------------------|------------------|-----------------------------|-------------|-----------------------------------------------------------------------------------------------------------------------------------------------------------------------------------------------------------------------------------------------------|----------|
|                       |              | No. of subjects for analysis         | Source of subjects                  | Event followed | No. of incident cases or deaths |                     |                  |                             |             |                                                                                                                                                                                                                                                     |          |
| Nakachi et al. (8)    | 1986–99      | 8552                                 | Population-based Saitama Prefecture | Death          | 140                             | Green tea, cups/day |                  |                             |             | Sex and lifestyle factors                                                                                                                                                                                                                           |          |
|                       |              |                                      |                                     |                |                                 | ≤3                  | 1.0              |                             |             |                                                                                                                                                                                                                                                     |          |
|                       |              |                                      |                                     |                |                                 | ≥10                 | 0.69 (0.23–1.88) |                             |             |                                                                                                                                                                                                                                                     |          |
| Tsubono et al. (9)    | 1984–92      | 26 311<br>11 902 men<br>14 409 women | Population-based Miyagi Prefecture  | Incidence      | 419<br>296 men<br>123 women     | Green tea, cups/day |                  |                             |             | Age, sex, types of health insurance, history of peptic ulcer, smoking status, alcohol consumption, daily consumption of rice, black tea, coffee, meat, green or yellow vegetables, pickled vegetables, other vegetables, fruits and bean-paste soup |          |
|                       |              |                                      |                                     |                |                                 | Total               |                  |                             |             |                                                                                                                                                                                                                                                     |          |
|                       |              |                                      |                                     |                |                                 | <1                  | 66               | 1.0                         |             |                                                                                                                                                                                                                                                     |          |
|                       |              |                                      |                                     |                |                                 | 1–2                 | 68               | 1.1 (0.8–1.6)               |             |                                                                                                                                                                                                                                                     |          |
|                       |              |                                      |                                     |                |                                 | 3–4                 | 79               | 1.0 (0.7–1.4)               |             |                                                                                                                                                                                                                                                     |          |
|                       |              |                                      |                                     |                |                                 | ≥5                  | 206              | 1.2 (0.9–1.6)               | 0.13        |                                                                                                                                                                                                                                                     |          |
|                       |              |                                      |                                     |                |                                 | Men                 |                  |                             |             |                                                                                                                                                                                                                                                     |          |
|                       |              |                                      |                                     |                |                                 | <1                  | 41               | 1.0                         |             |                                                                                                                                                                                                                                                     |          |
|                       |              |                                      |                                     |                |                                 | 1–2                 | 49               | 1.3 (0.8–1.9)               |             |                                                                                                                                                                                                                                                     |          |
|                       |              |                                      |                                     |                |                                 | 3–4                 | 55               | 1.2 (0.8–1.8)               |             |                                                                                                                                                                                                                                                     |          |
|                       |              |                                      |                                     |                |                                 | ≥5                  | 151              | 1.5 (1.0–2.1)               | 0.03        |                                                                                                                                                                                                                                                     |          |
|                       |              |                                      |                                     |                |                                 | Women               |                  |                             |             |                                                                                                                                                                                                                                                     |          |
| <1                    | 25           | 1.0                                  |                                     |                |                                 |                     |                  |                             |             |                                                                                                                                                                                                                                                     |          |
| 1–2                   | 19           | 0.8 (0.5–1.5)                        |                                     |                |                                 |                     |                  |                             |             |                                                                                                                                                                                                                                                     |          |
| 3–4                   | 24           | 0.7 (0.4–1.3)                        |                                     |                |                                 |                     |                  |                             |             |                                                                                                                                                                                                                                                     |          |
| ≥5                    | 55           | 0.8 (0.5–1.3)                        | 0.46                                |                |                                 |                     |                  |                             |             |                                                                                                                                                                                                                                                     |          |
| Hoshiyama et al. (10) | Mean 8 years | 72 851<br>30 370 men<br>42 481 women | Population-based 45 areas of Japan  | Death          | 359<br>240 men<br>119 women     | Green tea, cups/day |                  |                             |             | Age, smoking status, history of peptic ulcer, family history of stomach cancer, consumption of rice, miso soup, green–yellow vegetables, white vegetables, fruits and preference for salty foods                                                    |          |
|                       |              |                                      |                                     |                |                                 | Men                 |                  |                             |             |                                                                                                                                                                                                                                                     |          |
|                       |              |                                      |                                     |                |                                 | <1                  | 24               | 1.0                         |             |                                                                                                                                                                                                                                                     |          |
|                       |              |                                      |                                     |                |                                 | 1–2                 | 51               | 1.6 (0.9–2.9)               |             |                                                                                                                                                                                                                                                     |          |
|                       |              |                                      |                                     |                |                                 | 3–4                 | 51               | 1.1 (0.6–1.9)               |             |                                                                                                                                                                                                                                                     |          |
|                       |              |                                      |                                     |                |                                 | 5–9                 | 76               | 1.1 (0.6–1.9)               |             |                                                                                                                                                                                                                                                     |          |
|                       |              |                                      |                                     |                |                                 | ≥10                 | 38               | 1.0 (0.5–2.0)               | 0.634       |                                                                                                                                                                                                                                                     |          |
|                       |              |                                      |                                     |                |                                 | Women               |                  |                             |             |                                                                                                                                                                                                                                                     |          |
|                       |              |                                      |                                     |                |                                 | <1                  | 20               | 1.0                         |             |                                                                                                                                                                                                                                                     |          |
|                       |              |                                      |                                     |                |                                 | 1–2                 | 18               | 1.1 (0.5–2.5)               |             |                                                                                                                                                                                                                                                     |          |
|                       |              |                                      |                                     |                |                                 | 3–4                 | 40               | 1.0 (0.5–2.1)               |             |                                                                                                                                                                                                                                                     |          |
|                       |              |                                      |                                     |                |                                 | 5–9                 | 32               | 0.8 (0.4–1.6)               |             |                                                                                                                                                                                                                                                     |          |
| ≥10                   | 9            | 0.7 (0.3–2.0)                        | 0.476                               |                |                                 |                     |                  |                             |             |                                                                                                                                                                                                                                                     |          |

Continued

Table 1. *Continued*

| References                   | Study period     | Study population                     |                    |                |                                 | Category                     | No. among cases  | Relative risk (95% CI or <i>P</i> ) | <i>P</i> for trend | Confounding variables considered                                                                                          | Comments |
|------------------------------|------------------|--------------------------------------|--------------------|----------------|---------------------------------|------------------------------|------------------|-------------------------------------|--------------------|---------------------------------------------------------------------------------------------------------------------------|----------|
|                              |                  | No. of subjects for analysis         | Source of subjects | Event followed | No. of incident cases or deaths |                              |                  |                                     |                    |                                                                                                                           |          |
| Sasazuki et al. (11)         | 1990–2001        | 72,943<br>34,832 men<br>38,111 women | Population-based   | Incidence      | 892<br>665 men<br>227 women     | Green tea, cups/day          |                  |                                     |                    | Age, area, cigarette smoking, consumption of fruits, green or yellow vegetables, fishgut, miso soup, black tea and coffee |          |
|                              |                  |                                      |                    |                |                                 | Men                          |                  |                                     |                    |                                                                                                                           |          |
|                              |                  |                                      |                    |                |                                 | All sites                    |                  |                                     |                    |                                                                                                                           |          |
|                              |                  |                                      |                    |                |                                 | <1                           | 1.0              |                                     |                    |                                                                                                                           |          |
|                              |                  |                                      |                    |                |                                 | 1–2                          | 0.95 (0.72–1.22) |                                     |                    |                                                                                                                           |          |
|                              |                  |                                      |                    |                |                                 | 3–4                          | 0.84 (0.65–1.08) |                                     |                    |                                                                                                                           |          |
|                              |                  |                                      |                    |                |                                 | ≥5                           | 0.98 (0.77–1.25) | 0.65                                |                    |                                                                                                                           |          |
|                              |                  |                                      |                    |                |                                 | Upper-third including cardia |                  |                                     |                    |                                                                                                                           |          |
|                              |                  |                                      |                    |                |                                 | <1                           | 1.0              |                                     |                    |                                                                                                                           |          |
|                              |                  |                                      |                    |                |                                 | 1–2                          | 1.06 (0.51–2.18) |                                     |                    |                                                                                                                           |          |
|                              |                  |                                      |                    |                |                                 | 3–4                          | 0.73 (0.34–1.57) |                                     |                    |                                                                                                                           |          |
|                              |                  |                                      |                    |                |                                 | ≥5                           | 1.17 (0.60–2.30) | 0.75                                |                    |                                                                                                                           |          |
|                              |                  |                                      |                    |                |                                 | Distal                       |                  |                                     |                    |                                                                                                                           |          |
|                              |                  |                                      |                    |                |                                 | <1                           | 1.0              |                                     |                    |                                                                                                                           |          |
|                              |                  |                                      |                    |                |                                 | 1–2                          | 0.88 (0.64–1.20) |                                     |                    |                                                                                                                           |          |
|                              |                  |                                      |                    |                |                                 | 3–4                          | 0.79 (0.59–1.07) |                                     |                    |                                                                                                                           |          |
|                              |                  |                                      |                    |                |                                 | ≥5                           | 0.92 (0.69–1.22) | 0.37                                |                    |                                                                                                                           |          |
|                              |                  |                                      |                    |                |                                 | Women                        |                  |                                     |                    |                                                                                                                           |          |
|                              |                  |                                      |                    |                |                                 | All sites                    |                  |                                     |                    |                                                                                                                           |          |
|                              |                  |                                      |                    |                |                                 | <1                           | 1.0              |                                     |                    |                                                                                                                           |          |
| 1–2                          | 0.85 (0.53–1.38) |                                      |                    |                |                                 |                              |                  |                                     |                    |                                                                                                                           |          |
| 3–4                          | 1.04 (0.68–1.58) |                                      |                    |                |                                 |                              |                  |                                     |                    |                                                                                                                           |          |
| ≥5                           | 0.67 (0.43–1.04) | 0.08                                 |                    |                |                                 |                              |                  |                                     |                    |                                                                                                                           |          |
| Upper-third including cardia |                  |                                      |                    |                |                                 |                              |                  |                                     |                    |                                                                                                                           |          |
| <1                           | 1.0              |                                      |                    |                |                                 |                              |                  |                                     |                    |                                                                                                                           |          |
| 1–2                          |                  |                                      |                    |                |                                 |                              |                  |                                     |                    |                                                                                                                           |          |
| 3–4                          | 0.89 (0.34–2.33) |                                      |                    |                |                                 |                              |                  |                                     |                    |                                                                                                                           |          |
| ≥5                           |                  | 0.81                                 |                    |                |                                 |                              |                  |                                     |                    |                                                                                                                           |          |
| Distal                       |                  |                                      |                    |                |                                 |                              |                  |                                     |                    |                                                                                                                           |          |
| <1                           | 1.0              |                                      |                    |                |                                 |                              |                  |                                     |                    |                                                                                                                           |          |
| 1–2                          | 0.88 (0.52–1.49) |                                      |                    |                |                                 |                              |                  |                                     |                    |                                                                                                                           |          |
| 3–4                          | 1.00 (0.63–1.59) |                                      |                    |                |                                 |                              |                  |                                     |                    |                                                                                                                           |          |
| ≥5                           | 0.51 (0.30–0.86) | 0.01                                 |                    |                |                                 |                              |                  |                                     |                    |                                                                                                                           |          |

|                      |                |                      |                                                                              |                  |                  |                                 |                  |                                             |                                                                                                                                                                                                                                                                                          |
|----------------------|----------------|----------------------|------------------------------------------------------------------------------|------------------|------------------|---------------------------------|------------------|---------------------------------------------|------------------------------------------------------------------------------------------------------------------------------------------------------------------------------------------------------------------------------------------------------------------------------------------|
| Khan et al. (12)     | 1984–2002      | 3158                 | Population-based Hokkaido                                                    | Death            | 51               | Men                             |                  |                                             | Age, smoking, health status, health education, health screening                                                                                                                                                                                                                          |
|                      |                | 1524 men             |                                                                              |                  | 36 men           | Green tea ≤ several times/month | 1.0              |                                             |                                                                                                                                                                                                                                                                                          |
|                      |                | 1634 women           |                                                                              |                  | 15 women         | Green tea ≥ several times/week  | 1.1 (0.4–2.5)    |                                             |                                                                                                                                                                                                                                                                                          |
|                      |                |                      |                                                                              |                  |                  | Women                           |                  |                                             |                                                                                                                                                                                                                                                                                          |
|                      |                |                      |                                                                              |                  |                  | Green tea ≤ several times/month | 1.0              |                                             |                                                                                                                                                                                                                                                                                          |
|                      |                |                      |                                                                              |                  |                  | Green tea ≥ several times/week  | 0.7 (0.2–2.9)    |                                             |                                                                                                                                                                                                                                                                                          |
| Sauvaget et al. (13) | 1980–99        | 38 576               | Atomic-bomb survivors: Hiroshima, Nagasaki                                   | Incidence        | 1270             | Green tea, cups/day             |                  |                                             | Sex, sex-specific age, city, radiation dose, sex-specific smoking habits and education level                                                                                                                                                                                             |
|                      |                | 14 885 men           |                                                                              |                  | <2               | 242                             | 1.0              |                                             |                                                                                                                                                                                                                                                                                          |
|                      |                | 23 691 women         |                                                                              |                  | 2–4              | 680                             | 1.03 (0.89–1.19) |                                             |                                                                                                                                                                                                                                                                                          |
|                      |                | 34–98 years old      |                                                                              |                  | ≥5               | 348                             | 1.06 (0.89–1.25) | >0.50                                       |                                                                                                                                                                                                                                                                                          |
| Kuriyama et al. (14) | All-cause      | 40 530               | Population-based                                                             | Death            | 193              | Green tea, cups/day             |                  |                                             | Age, sex, job status, years of education, BMI, sports or exercise, walking duration, history of HT, DM, GU, smoking, alcohol, total energy, rice, miso soup, soy bean product, total meat, total fish, dairy products, total fruits, total vegetables, oolong tea, black tea, and coffee |
|                      |                | 1995–2005 (11 years) |                                                                              |                  | 19 060 men       | <1                              | 44               | 1.0                                         |                                                                                                                                                                                                                                                                                          |
|                      | Cause-specific | 21 470 women         | 1–2                                                                          | 44               | 1.33 (0.86–2.04) |                                 |                  |                                             |                                                                                                                                                                                                                                                                                          |
|                      |                | 1995–2001 (7 years)  | 3–4                                                                          | 38               | 1.00 (0.64–1.58) |                                 |                  |                                             |                                                                                                                                                                                                                                                                                          |
|                      |                | 5≤                   | 67                                                                           | 1.17 (0.78–1.76) | 0.72             |                                 |                  |                                             |                                                                                                                                                                                                                                                                                          |
|                      |                |                      | 138 men                                                                      | <1               | 32               | 1.0                             |                  |                                             |                                                                                                                                                                                                                                                                                          |
|                      |                |                      |                                                                              | 1–2              | 30               | 1.29 (0.78–2.16)                |                  |                                             |                                                                                                                                                                                                                                                                                          |
|                      |                |                      |                                                                              | 3–4              | 30               | 1.19 (0.71–2.00)                |                  |                                             |                                                                                                                                                                                                                                                                                          |
|                      |                |                      |                                                                              | ≥5               | 46               | 1.20 (0.74–1.95)                | 0.55             |                                             |                                                                                                                                                                                                                                                                                          |
|                      |                |                      | 55 women                                                                     | <1               | 12               | 1.0                             |                  |                                             |                                                                                                                                                                                                                                                                                          |
|                      |                |                      | 1–2                                                                          | 14               | 1.32 (0.59–2.94) |                                 |                  |                                             |                                                                                                                                                                                                                                                                                          |
|                      |                |                      | 3–4                                                                          | 8                | 0.64 (0.26–1.63) |                                 |                  |                                             |                                                                                                                                                                                                                                                                                          |
|                      |                |                      | ≥5                                                                           | 21               | 1.08 (0.50–2.33) | 0.84                            |                  |                                             |                                                                                                                                                                                                                                                                                          |
| Suzuki et al. (15)   | 1999–2006      | 12 251               | Population randomly chosen from all 74 municipalities in Shizuoka Prefecture | Death            | 68               | Green tea, cups/day             |                  |                                             | Age, sex, smoking, alcohol, BMI, and physical activity                                                                                                                                                                                                                                   |
|                      |                | 6231 men             |                                                                              |                  | <1               | 2                               | 1.0              | Test for trend:<br>HR = 1.04<br>(0.95–1.13) |                                                                                                                                                                                                                                                                                          |
|                      |                | 6020 women           |                                                                              |                  | 1–3              | 14                              | 0.49 (0.11–2.28) |                                             |                                                                                                                                                                                                                                                                                          |
|                      |                | 65–84y old           |                                                                              |                  | 4–6              | 32                              | 0.78 (0.19–3.30) |                                             |                                                                                                                                                                                                                                                                                          |
|                      |                |                      |                                                                              |                  | ≥7               | 20                              | 0.81 (0.18–3.54) |                                             |                                                                                                                                                                                                                                                                                          |
|                      |                |                      |                                                                              |                  |                  |                                 |                  |                                             |                                                                                                                                                                                                                                                                                          |

Continued

Table 1. Continued

| References                                                                                                                                    | Study period | Study population             |                    |                |                                 | Category                  | No. among cases | Relative risk (95% CI or P) | P for trend | Confounding variables considered                                                                                                                         | Comments |
|-----------------------------------------------------------------------------------------------------------------------------------------------|--------------|------------------------------|--------------------|----------------|---------------------------------|---------------------------|-----------------|-----------------------------|-------------|----------------------------------------------------------------------------------------------------------------------------------------------------------|----------|
| Author                                                                                                                                        |              | No. of subjects for analysis | Source of subjects | Event followed | No. of incident cases or deaths |                           |                 |                             |             |                                                                                                                                                          |          |
| Pooled analysis of 6 cohort studies including those listed above (9,10, cohort I of 11, cohort II of 11) or mentioned in the text (20 and 21) |              |                              |                    |                |                                 |                           |                 |                             |             |                                                                                                                                                          |          |
| Inoue et al. (16)                                                                                                                             | 1985–2004    | 219 080                      | Population-based   | Incidence      | 3577                            | Green tea, cups/day       |                 |                             |             |                                                                                                                                                          |          |
|                                                                                                                                               |              | 100 479 men                  |                    |                | 2495 men                        | Men                       |                 |                             |             | Age, area (for three cohorts only), smoking, alcohol drinking, rice, soy bean paste soup, coffee, pickled vegetables, and green-yellow vegetables intake |          |
|                                                                                                                                               |              | 118 601 women                |                    |                | 1082 women                      | All sites                 |                 |                             |             |                                                                                                                                                          |          |
|                                                                                                                                               |              |                              |                    |                |                                 | <1                        | 420             | 1.0                         |             |                                                                                                                                                          |          |
|                                                                                                                                               |              |                              |                    |                |                                 | 1–2                       | 452             | 0.97 (0.83–1.12)            |             |                                                                                                                                                          |          |
|                                                                                                                                               |              |                              |                    |                |                                 | 3–4                       | 610             | 0.93 (0.81–1.08)            |             |                                                                                                                                                          |          |
|                                                                                                                                               |              |                              |                    |                |                                 | ≥5                        | 1013            | 1.06 (0.86–1.30)            | 0.74        |                                                                                                                                                          |          |
|                                                                                                                                               |              |                              |                    |                |                                 | Proximal (upper third)    |                 |                             |             |                                                                                                                                                          |          |
|                                                                                                                                               |              |                              |                    |                |                                 | <1                        | 38              | 1.0                         |             |                                                                                                                                                          |          |
|                                                                                                                                               |              |                              |                    |                |                                 | 1–2                       | 41              | 1.10 (0.70–1.73)            |             |                                                                                                                                                          |          |
|                                                                                                                                               |              |                              |                    |                |                                 | 3–4                       | 42              | 0.79 (0.46–1.35)            |             |                                                                                                                                                          |          |
|                                                                                                                                               |              |                              |                    |                |                                 | ≥5                        | 96              | 1.43 (0.96–2.14)            | 0.08        |                                                                                                                                                          |          |
|                                                                                                                                               |              |                              |                    |                |                                 | Distal (lower two-thirds) |                 |                             |             |                                                                                                                                                          |          |
|                                                                                                                                               |              |                              |                    |                |                                 | <1                        | 185             | 1.0                         |             |                                                                                                                                                          |          |
|                                                                                                                                               |              |                              |                    |                |                                 | 1–2                       | 185             | 0.91 (0.73–1.12)            |             |                                                                                                                                                          |          |
|                                                                                                                                               |              |                              |                    |                |                                 | 3–4                       | 249             | 0.95 (0.77–1.16)            |             |                                                                                                                                                          |          |
|                                                                                                                                               |              |                              |                    |                |                                 | ≥5                        | 328             | 0.96 (0.79–1.17)            | 0.86        |                                                                                                                                                          |          |
|                                                                                                                                               |              |                              |                    |                |                                 | Women                     |                 |                             |             |                                                                                                                                                          |          |
|                                                                                                                                               |              |                              |                    |                |                                 | All sites                 |                 |                             |             |                                                                                                                                                          |          |
|                                                                                                                                               |              |                              |                    |                |                                 | <1                        | 215             | 1.0                         |             |                                                                                                                                                          |          |
|                                                                                                                                               |              |                              |                    |                |                                 | 1–2                       | 174             | 0.90 (0.73–1.10)            |             |                                                                                                                                                          |          |
|                                                                                                                                               |              |                              |                    |                |                                 | 3–4                       | 303             | 0.92 (0.76–1.11)            |             |                                                                                                                                                          |          |
|                                                                                                                                               |              |                              |                    |                |                                 | ≥5                        | 390             | 0.79 (0.65–0.96)            | 0.04        |                                                                                                                                                          |          |
|                                                                                                                                               |              |                              |                    |                |                                 | Proximal (upper third)    |                 |                             |             |                                                                                                                                                          |          |
|                                                                                                                                               |              |                              |                    |                |                                 | <1                        | 8               | 1.0                         |             |                                                                                                                                                          |          |
|                                                                                                                                               |              |                              |                    |                |                                 | ≥1                        | 45              | 1.17 (0.52–2.60)            | 0.87        |                                                                                                                                                          |          |
|                                                                                                                                               |              |                              |                    |                |                                 | Distal (lower two thirds) |                 |                             |             |                                                                                                                                                          |          |
|                                                                                                                                               |              |                              |                    |                |                                 | <1                        | 83              | 1.0                         |             |                                                                                                                                                          |          |
|                                                                                                                                               |              |                              |                    |                |                                 | 1–2                       | 64              | 0.80 (0.57–1.13)            |             |                                                                                                                                                          |          |
|                                                                                                                                               |              |                              |                    |                |                                 | 3–4                       | 117             | 0.96 (0.71–1.30)            |             |                                                                                                                                                          |          |
|                                                                                                                                               |              |                              |                    |                |                                 | ≥5                        | 106             | 0.70 (0.50–0.96)            | 0.04        |                                                                                                                                                          |          |

NS, not significant; BMI, body mass index; HT, hypertension; DM, diabetes mellitus; GU, gastric ulcer.

**Table 2.** Gastric cancer risk and consumption of green tea in case–control studies of Japanese populations

| References               | Study time | Study subjects                             |                                                                                         |              |                          | Category                                     | Relative risk (95% CI)     | P for trend | Confounding variables considered         | Comments                                                          |
|--------------------------|------------|--------------------------------------------|-----------------------------------------------------------------------------------------|--------------|--------------------------|----------------------------------------------|----------------------------|-------------|------------------------------------------|-------------------------------------------------------------------|
| Author                   |            | Type and source                            | Definition                                                                              | No. of cases | No. of controls          |                                              |                            |             |                                          |                                                                   |
| Tajima and Tominaga (17) | 1981–83    | Hospital-based (Aichi Cancer Center)       | Cases:<br>Histologically confirmed cases                                                | 93           | 186                      | Green tea, times/day<br>≥4                   | 0.64                       | NS          |                                          | Matched for age (± 5 years), sex, time of interviews (± 6 months) |
|                          |            |                                            | Controls:<br>Patients without stomach cancer                                            |              |                          | ≤3                                           | 1.0                        |             |                                          |                                                                   |
| Kono et al. (18)         | 1979–82    | Hospital-based (Karatsu Stomach Institute) | Cases:<br>Newly diagnosed as having gastric cancer at the Institute                     | 139          | Hospital controls: 2574  | vs. hospital controls<br>Green tea, cups/day |                            |             |                                          |                                                                   |
|                          |            |                                            |                                                                                         | 74 men       |                          | None or 1–4                                  | 1.0                        |             | Age, sex                                 |                                                                   |
|                          |            |                                            |                                                                                         | 65 women     | 1171 men<br>1403 women   | 5–9                                          | 1.1                        |             |                                          |                                                                   |
|                          |            |                                            |                                                                                         |              |                          | ≥10                                          | 0.6                        | NS          |                                          |                                                                   |
|                          |            |                                            | Hospital controls:<br>Patients without gastric cancer                                   |              | General controls;<br>278 | ≤9                                           | 1.0                        |             | Age, sex, smoking, oranges, fruits       |                                                                   |
|                          |            |                                            |                                                                                         |              | 148 men                  | ≥10                                          | 0.5 (0.3–1.1)              |             |                                          |                                                                   |
|                          |            |                                            | General population controls:<br>Random sampling from the computerized file of residents |              | 130 women                | vs. general controls<br>Green tea, cups/day  |                            |             | General population:<br>Matched (1:2) for |                                                                   |
|                          |            |                                            |                                                                                         |              |                          | None or 1–4                                  | 1.0                        |             | Sex                                      |                                                                   |
|                          |            |                                            |                                                                                         |              |                          | 5–9                                          | 1.2                        |             | Age                                      |                                                                   |
|                          |            |                                            |                                                                                         |              |                          | ≥10                                          | 0.4*                       | NS          |                                          |                                                                   |
|                          |            |                                            |                                                                                         |              |                          | ≤9                                           | 1.0                        |             | Smoking, oranges, fruits                 |                                                                   |
|                          |            |                                            |                                                                                         |              |                          | ≥10                                          | 0.3 (0.1–0.7) <sup>†</sup> |             |                                          |                                                                   |

Continued

Table 2. Continued

| References        | Study time | Study subjects                       | Definition                                                                                                           | No. of cases | No. of controls | Category                                                                                       | Relative risk (95% CI)                                                                                    | P for trend | Confounding variables considered                                                                                                                                                                          | Comments |
|-------------------|------------|--------------------------------------|----------------------------------------------------------------------------------------------------------------------|--------------|-----------------|------------------------------------------------------------------------------------------------|-----------------------------------------------------------------------------------------------------------|-------------|-----------------------------------------------------------------------------------------------------------------------------------------------------------------------------------------------------------|----------|
| Inoue et al. (19) | 1990–95    | Hospital-based (Aichi Cancer Center) | Cases: Histologically diagnosed cases of gastric cancer at the Institute<br><br>Controls: Outpatients without cancer | 893          | 21 128          | Green tea<br>Rarely<br><br>Occasional<br>Daily<br>1–3 cups/day<br>4–6 cups/day<br>≥ 7 cups/day | 1.00<br><br>1.00 (0.77–1.44)<br><br>0.96 (0.70–1.32)<br>1.01 (0.74–1.39)<br>0.69 (0.48–1.00) <sup>‡</sup> |             | Coffee intake, black tea intake, gender, age, year and season at first hospital visit, habitual smoking, habitual alcohol drinking, regular physical exercise, fruit intake, rice intake, and beef intake |          |

NS, not significant.  
<sup>\*</sup>*P* > 0.05.  
<sup>†</sup>*P* = 0.007.  
<sup>‡</sup>*P* > 0.05.

control studies consistently showed a weak negative association between intake of green tea and risk of gastric cancer (Table 4). Among them, when using the general population as a control setting, Kono et al. (18) observed a strong negative association between green tea intake and gastric cancer risk.

During the review process, we were aware of the difference in effect by sex. In all studies that presented the analysis for men and women separately, although not statistically significant, the point estimate of highest category of green tea intake for women was consistently lower than that for men; i.e. based on incidence data, compared with <1 cup/day, the RRs of drinking ≥5 cups/day for men and women were estimated as 1.5 and 0.8 (9) and 0.98 and 0.67 (11), respectively (Table 1). Based on mortality data, the corresponding values for men and women were estimated as 1.0 and 0.7 (<1 vs. ≥10 cups/day) (10), and 1.1 and 0.7 (less than several times per month vs. more than several times per week) (12), respectively (Table 1). These results suggest a small protective effect, if any, of green tea intake and development of gastric cancer for women. However, applying our definition of magnitudes of association, they slightly failed to reach the level of weak association (weak association for 0.5 to <0.67, not significant). The null association observed among men may, in part, reflect insufficient adjustment for confounding factors such as cigarette smoking. Likewise, differences in the effect of green tea by subsite may point to an inconsistent effect on gastric cancer overall (11). However, evidence for such specific issues is sparse, probably due to the relatively small number of gastric cancer cases occurring in the upper subsite among cohorts, particularly in women. Results from pooled analysis may lead to a better understanding of these unresolved issues.

In a pooled analysis of six cohort studies (9–11,13,20,21) involving total of 219 080 subjects and 3577 gastric cancer cases, the role of green tea intake and gastric cancer risk was analyzed for men and women separately, with consideration of smoking status, anatomic subsite and so on (16). As a result, a statistically significant, weakly decreased risk of gastric cancer with ≥5 cups/day of green tea intake among women was observed [hazard ratio (HR) = 0.79, 95% confidence interval (CI) 0.65–0.96], although no association was observed among men (Tables 1 and 3). When the anatomic subsite was considered among four cohort studies in which the data were routinely collected, the risk reduction among women was more prominent in the distal gastric region (HR = 0.70, range 0.50–0.96; *P* for trend = 0.04). Together with the results of the systematic review, this finding from the pooled analysis was also considered to finally evaluate the evidence for green tea intake and gastric cancer risk in Japanese.

A difference in the effect of green tea intake by sex has also been observed for cardiovascular disease (14,22,23). The exact reason for the difference is unknown but may be explained, in part, by residual confounding effects of



smoking, phytoestrogens in tea and so on. It was suggested in some studies (9,14), but not all (16), that cigarette smoking might modify the effect of green tea. Tsubono et al. (9) observed a trend toward a positive association between green tea consumption and the risk of gastric cancer in subjects currently smoking  $\geq 20$  cigarettes/day ( $P$  for trend = 0.06), but not in other groups ( $P$  for the interaction term = 0.17). A similar interaction was suggested among studies investigating green tea intake and risk for cardiovascular disease (14). Higher rates of smoking may mask the effect of green tea consumption in men. Tea flavonoids such as kaempferol have been shown to exhibit estrogenic activity *in vitro* (24). In addition, tea contains lignan polyphenols, such as secoisolaracinol, which are considered phytoestrogenic (25). The phytoestrogens in tea might also partly account for the stronger protective effect of green tea in women than in men (26,27), although an estrogen-related protective mechanism against gastric cancer, if any, warrants further investigation.

Several aspects need to be discussed in relation to interpreting the present findings. Although cigarette smoking, which is suggested to have an interactive effect with green tea, was adjusted in most studies, *H. pylori* infection, a Group 1 carcinogen recognized by the International Agency for Research on Cancer (IARC), was not considered in any study. Based on the same origin of cohort study (10), Hoshiyama et al. (28) investigated whether green tea has any association with gastric cancer risk with considering *H. pylori* infection in a nested case–control study design within 157 incidence cases and 285 controls. They found that green tea intake had no protective effect against gastric cancer even after controlling for *H. pylori* infection. A previous nested case–control study that investigated plasma tea polyphenols and risk for gastric cancer reported that the decreased risk of gastric cancer by intake of tea polyphenols observed among women in the study remained even after adjusting for *H. pylori* infection (29). Some researchers used an animal model to report the inhibition of *H. pylori* urease by green tea extract (30) and the bactericidal effect on *H. pylori* infection by green tea catechins (31). A long-term habit of drinking green tea might lead to the elimination of *H. pylori*; if this is true, *H. pylori* may act as an intermediate rather than a confounding factor in the relationship between green tea and gastric cancer.

Discrepancies were noted in the effects of green tea on gastric cancer risk between case–control studies and cohort studies. The discrepancies were quantitatively shown from a recent meta-analysis of green tea intake and gastric cancer risk based on 13 studies from Japan and China (32). Compared with the lowest level of green tea intake, the RR of gastric cancer for the highest level of green tea intake was 0.73 (95% CI 0.64–0.83) for case–control studies, whereas no association was observed for cohort studies (RR = 1.04, 95% CI 0.93–1.17). The discrepancy may be partially explained by recall or selection biases that are inevitable in case–control studies. For example, it is possible that

individuals with gastric cancer reduce their green tea intake due to their gastric symptoms. In fact, it has been reported that among those with gastric cancer, black tea consumption was reduced even up to 2 years before their diagnosis was made (33). Therefore, the green tea intake for gastric cancer cases among case–control studies might be partly underreported. Another point is the variation of gastric cancer mortality rates across the country. The age-adjusted gastric cancer mortality rate under age 75 in 2009 in Japan was 11.8/100 000 and ranged from 6.3 (Okinawa prefecture) to 15.7 (Akita prefecture) (34). It is interesting that gastric cancer mortality rates in the two prefectures in the case–control studies are higher than the average level, whereas the situation for cohort studies is mixed. On the basis of wide variation in gastric cancer mortality rates by area, the approach such as pooled analysis might be important.

However, the null results in cohort studies also contradict the results of previous experimental studies that suggested the protective effect of tea polyphenols on gastric cancer using *in vivo* animal models and *in vitro* cancer cell lines (3). In most of the cohort studies where the validity of green tea intake was examined, a moderate validity was shown; the Spearman coefficient for the correlation between the green tea intake according to the questionnaire and the amounts consumed according to the food records ranged from 0.29 to 0.71 (9–11,13,14). However, in all epidemiologic studies investigating green tea intake and gastric cancer risk, green tea consumption was determined only in terms of self-reported frequency of drinking, and the size of the cup was not ascertained. Furthermore, the amount of tea polyphenols in one cup varies according to preparation, i.e. the type and amount of green tea leaves, the frequency of renewing a tea batch in the pot, the temperature of boiled water or time to brew the tea and so on. A number of studies have found that hot drinks have an effect on the risk for esophageal cancer (35). Yu et al. (36) also showed that boiling hot tea had a non-significant increased risk of causing gastric cancer (odds ratio = 1.18). The risk estimates for the cardia, pylori and antrum sites regarding boiling hot tea were 2.09, 0.56 and 0.82, respectively. Furthermore, the term ‘green tea’ might be ambiguous because some participants may include only ‘sencha’, which looks green, or others may also include ‘bancha/houjicha/genmaicha’, which is also a commonly consumed Japanese tea but looks brown. Sencha, one of the most popular green teas in Japan, contains higher levels of tannin, vitamin C and folate than bancha/houjicha/genmaicha (37). Inaccurate measurement of green tea consumption in epidemiologic studies necessarily attenuates the small effect of green tea. It is interesting that both studies using biomarkers of green tea intake showed a statistically significant association with gastric cancer. Sun et al. (38) reported that urinary (–)-epigallocatechin (EGC) showed a statistically significant inverse association with gastric cancer. In a case–control study nested within a cohort study (11), a high plasma level of EGC was associated with an increased risk of gastric cancer in men, whereas a high plasma level of

**Table 3.** Summary of associations between gastric cancer risk and consumption of green tea in cohort studies of Japanese populations

| References                                                                                                                                    |      |          | Study period | Study subjects |                 |           |           |              | Strength of association |
|-----------------------------------------------------------------------------------------------------------------------------------------------|------|----------|--------------|----------------|-----------------|-----------|-----------|--------------|-------------------------|
| Author                                                                                                                                        | Year | Ref. no. |              | Sex            | No. of subjects | Age range | Event     | No. of cases |                         |
| Nakachi et al.                                                                                                                                | 2000 | 8        | 1986–99      | Men and women  | 8552            | 40+       | Death     | 140          | –                       |
| Tsubono et al.                                                                                                                                | 2001 | 9        | 1984–92      | Men            | 11 902          | 40+       | Incidence | 296          | ↑                       |
|                                                                                                                                               |      |          |              | Women          | 14 409          |           |           | 123          | –                       |
| Hoshiyama et al.                                                                                                                              | 2002 | 10       | 1988–97      | Men            | 30 370          | 40–79     | Death     | 240          | –                       |
|                                                                                                                                               |      |          |              | Women          | 42 481          |           |           | 119          | –                       |
| Sasazuki et al.                                                                                                                               | 2004 | 11       | 1990–2001    | Men            | 34 832          | 40–59     | Incidence | 665          | –                       |
|                                                                                                                                               |      |          |              | Women          | 38 111          |           |           | 227          | – (distal ↓↓)           |
| Khan et al.                                                                                                                                   | 2004 | 12       | 1984–2002    | Men            | 1524            | 40+       | Death     | 36           | –                       |
|                                                                                                                                               |      |          |              | Women          | 1634            |           |           | 15           | –                       |
| Sauvaget et al.                                                                                                                               | 2005 | 13       | 1980–99      | Men and women  | 38 576          | 34–98     | Incidence | 1270         | –                       |
| Kuriyama et al.                                                                                                                               | 2006 | 14       | 1995–2001    | Men            | 19 060          | 40–79     | Death     | 138          | –                       |
|                                                                                                                                               |      |          |              | Women          | 21 470          |           |           | 55           | –                       |
| Suzuki et al.                                                                                                                                 | 2009 | 15       | 1999–2006    | Men and women  | 12 251          | 65–84     | Death     | 68           | –                       |
| Pooled analysis of 6 cohort studies including those listed above (9,10, cohort I of 11, cohort II of 11) or mentioned in the text (20 and 21) |      |          |              |                |                 |           |           |              |                         |
| Inoue et al.                                                                                                                                  | 2009 | 16       | 1985–2004    | Men            | 100 479         | 40–103    | Incidence | 2495         | –                       |
|                                                                                                                                               |      |          |              | Women          | 118 601         |           |           | 1082         | ↓                       |

Explanation for each symbol is as follows when statistical significance (SS) or no statistical significance (NS), strong (symbol ↓↓↓ or ↑↑↑), <0.5 or >2.0 (SS); moderate (symbol ↓↓ or ↑↑), either (i) <0.5 or >2.0 (NS), (ii) >1.5–2 (SS) or (iii) 0.5 to <0.67 (SS); weak (symbol ↓ or ↑), either (i) >1.5–2 (NS), (ii) 0.5 to <0.67 (NS) or (iii) 0.67–1.5 (SS); or no association (symbol –), 0.67–1.5 (NS).

**Table 4.** Summary of associations between gastric cancer risk and consumption of green tea in case–control studies of Japanese populations

| References          |      |          | Study period | Study subjects |           |              |                    | Strength of association |     |
|---------------------|------|----------|--------------|----------------|-----------|--------------|--------------------|-------------------------|-----|
| Author              | Year | Ref. no. |              | Sex            | Age range | No. of cases | No. of controls    |                         |     |
| Tajima and Tominaga | 1985 | 17       | 1981–83      | Men and women  | 40–70     | 93           | 186                | ↓                       |     |
| Kono et al.         | 1988 | 18       | 1979–82      | Men and women  | 20–75     | 139          | Hospital           | 2547                    | ↓   |
|                     |      |          |              |                |           |              | General population | 278                     | ↓↓↓ |
| Inoue et al.        | 1998 | 19       | 1990–95      | Men and women  | 40+       | 893          | 21 128             | ↓                       |     |

Explanation for each symbol is as follows when statistical significance (SS) or no statistical significance (NS), strong (symbol ↓↓↓ or ↑↑↑), <0.5 or >2.0 (SS); moderate (symbol ↓↓ or ↑↑), either (i) <0.5 or >2.0 (NS), (ii) >1.5–2 (SS) or (iii) 0.5 to <0.67 (SS); weak (symbol ↓ or ↑), either (i) >1.5–2 (NS), (ii) 0.5 to <0.67 (NS) or (iii) 0.67–1.5 (SS); or no association (symbol –), 0.67–1.5 (NS).

(–)-epicatechin-3-gallate was associated with a statistically significant decreased risk of gastric cancer in women (29).

In conclusion, we found no preventive effect on gastric cancer for green tea intake in cohort studies, which have fewer biases and are more persuasive than case–control studies, where risk reduction was shown. However, a small, consistent risk reduction limited to women was observed, which was confirmed by pooling data from six cohort studies.

## EVALUATION OF EVIDENCE ON GREEN TEA CONSUMPTION AND GASTRIC CANCER RISK IN JAPANESE

From the results of the systematic review and pooled analysis of green tea intake and gastric cancer risk and on the basis of assumed biologic plausibility, we conclude that green tea possibly decreases the risk of gastric cancer in women. However, epidemiologic evidence is still insufficient to demonstrate any association in men.

## Acknowledgements

The authors gratefully acknowledge the assistance of Ms Izumi Suenaga in this report.

## Funding

This study was supported by the Third Term Comprehensive 10-year Strategy for Cancer Control from the Ministry of Health, Labour and Welfare, Japan.

## Conflict of interest statement

None declared.

## References

- Center for Cancer Control and Information Services [NCC website]. Trend in age-standardized cancer mortality rate, 1958 through 2009. [http://ganjoho.jp/pro/statistics/en/gdb\\_trend.html?1%1](http://ganjoho.jp/pro/statistics/en/gdb_trend.html?1%1) [cited 3 August 2011].
- Kelley JR, Duggan JM. Gastric cancer epidemiology and risk factors. *J Clin Epidemiol* 2003;56:1–9.
- Yang CS, Lee MJ, Chen L, Yang GY. Polyphenols as inhibitors of carcinogenesis. *Environ Health Perspect* 1997;105(Suppl 4):971–6.
- World Cancer Research Fund/AICR. *Food, Nutrition and the Prevention of Cancer: A Global Perspective*. Washington, DC: American Institute for Cancer Research 1997.
- World Cancer Research Fund/AICR. *Food, Nutrition, Physical Activity, and the Prevention of Cancer: Global Perspective*. Washington, DC: American Institute for Cancer Research 2007.
- Inoue M, Tsuji I, Wakai K, Nagata C, Mizoue T, Tanaka K, et al., Research Group for the Development and Evaluation of Cancer Prevention Strategies in Japan. Evaluation based on systematic review of epidemiological evidence among Japanese populations: tobacco smoking and total cancer risk. *Jpn J Clin Oncol* 2005;35:404–11.
- World Health Organization. *WHO Technical Reports Series 916. Diet, Nutrition and Prevention of Chronic Diseases: Report of a Joint WHO/FAO Expert Consultation*. Geneva, Switzerland: WHO 2003.
- Nakachi K, Matsuyama S, Miyake S, Suganuma M, Imai K. Preventive effects of drinking green tea on cancer and cardiovascular disease: epidemiological evidence for multiple targeting prevention. *Biofactors* 2000;13:49–54.
- Tsubono Y, Nishino Y, Komatsu S, Hsieh CC, Kanemura S, Tsuji I, et al. Green tea and the risk of gastric cancer in Japan. *N Engl J Med* 2001;344:632–6.
- Hoshiyama Y, Kawaguchi T, Miura Y, Mizoue T, Tokui N, Yatsuya H, et al. A prospective study of stomach cancer death in relation to green tea consumption in Japan. *Br J Cancer* 2002;87:309–13.
- Sasazuki S, Inoue M, Hanaoka T, Yamamoto S, Sobue T, Tsugane S. Green tea consumption and subsequent risk of gastric cancer by subsite: the JPHC Study. *Cancer Causes Control* 2004;15:483–91.
- Khan MM, Goto R, Kobayashi K, Suzumura S, Nagata Y, Sonoda T, et al. Dietary habits and cancer mortality among middle aged and older Japanese living in Hokkaido, Japan by cancer site and sex. *Asian Pac J Cancer Prev* 2004;5:58–65.
- Sauvaget C, Lagarde F, Nagano J, Soda M, Koyama K, Kodama K. Lifestyle factors, radiation and gastric cancer in atomic-bomb survivors (Japan). *Cancer Causes Control* 2005;16:773–80.
- Kuriyama S, Shimazu T, Ohmori K, Kikuchi N, Nakaya N, Nishino Y, et al. Green tea consumption and mortality due to cardiovascular disease, cancer, and all causes in Japan: the Ohsaki study. *J Am Med Assoc* 2006;296:1255–65.
- Suzuki E, Yorifuji T, Takao S, Komatsu H, Sugiyama M, Ohta T, et al. Green tea consumption and mortality among Japanese elderly people: the prospective Shizuoka elderly cohort. *Ann Epidemiol* 2009;19:732–9.
- Inoue M, Sasazuki S, Wakai K, Suzuki T, Matsuo K, Shimazu T, et al., Research Group for the Development and Evaluation of Cancer Prevention Strategies in Japan. Green tea consumption and gastric cancer in Japanese: a pooled analysis of six cohort studies. *Gut* 2009;58:1323–32.
- Tajima K, Tominaga S. Dietary habits and gastro-intestinal cancers: a comparative case-control study of stomach and large intestinal cancers in Nagoya, Japan. *Jpn J Cancer Res* 1985;76:705–16.
- Kono S, Ikeda M, Tokudome S, Kuratsune M. A case-control study of gastric cancer and diet in northern Kyushu, Japan. *Jpn J Cancer Res* 1988;79:1067–74.
- Inoue M, Tajima K, Hirose K, Hamajima N, Takezaki T, Kuroishi T, et al. Tea and coffee consumption and the risk of digestive tract cancers: data from a comparative case-referent study in Japan. *Cancer Causes Control* 1998;9:209–16.
- Koizumi Y, Tsubono Y, Nakaya N, Nishino Y, Shibuya D, Matsuoka H, et al. No association between green tea and the risk of gastric cancer: pooled analysis of two prospective studies in Japan. *Cancer Epidemiol Biomarkers Prev* 2003;12:472–3.
- Marugame T, Sobue T, Satoh H, Komatsu S, Nishino Y, Nakatsuka H, et al. Lung cancer death rates by smoking status: comparison of the Three-Prefecture Cohort study in Japan to the Cancer Prevention Study II in the USA. *Cancer Sci* 2005;96:120–6.
- Geleijnse JM, Launer LJ, Hofman A, Pols HA, Witteman JC. Tea flavonoids may protect against atherosclerosis: the Rotterdam Study. *Arch Intern Med* 1999;159:2170–4.
- Geleijnse JM, Launer LJ, Van der Kuip DA, Hofman A, Witteman JC. Inverse association of tea and flavonoid intakes with incident myocardial infarction: the Rotterdam study. *Am J Clin Nutr* 2002;75:880–6.
- Miksicsek RJ. Estrogenic flavonoids: structural requirements for biological activity. *Proc Soc Exp Biol Med* 1995;208:44–50.
- Mazur WM, Wähälä K, Rasku S, Salakka A, Hase T, Adlercreutz H. Lignan and isoflavonoid concentrations in tea and coffee. *Br J Nutr* 1998;79:37–45.
- Cheng TO. Why is green tea more cardioprotective in women than in men? *Int J Cardiol* 2007;122:244.
- Geleijnse JM, Witteman JC, Launer LJ, Lamberts SW, Pols HA. Tea and coronary heart disease: protection through estrogen-like activity? *Arch Intern Med* 2000;160:3328–9.
- Hoshiyama Y, Kawaguchi T, Miura Y, Mizoue T, Tokui N, Yatsuya H, et al., Japan Collaborative Cohort Study Group. A nested case-control study of stomach cancer in relation to green tea consumption in Japan. *Br J Cancer* 2004;90:135–8.
- Sasazuki S, Inoue M, Miura T, Iwasaki M, Tsugane S, Japan Public Health Center-based Prospective Study Group. Plasma tea polyphenols and gastric cancer risk: a case-control study nested in a large population-based prospective study in Japan. *Cancer Epidemiol Biomarkers Prev* 2008;17:343–51.
- Matsubara S, Shibata H, Ishikawa F, Yokokura T, Takahashi M, Sugimura T, et al. Suppression of *Helicobacter pylori*-induced gastritis by green tea extract in Mongolian gerbils. *Biochem Biophys Res Commun* 2003;310:715–9.
- Takabayashi F, Harada N, Yamada M, Murohisa B, Oguni I. Inhibitory effect of green tea catechins in combination with sucralfate on *Helicobacter pylori* infection in Mongolian gerbils. *J Gastroenterol* 2004;39:61–3.
- Myung SK, Bae WK, Oh SM, Kim Y, Ju W, Sung J, et al. Green tea consumption and risk of stomach cancer: a meta-analysis of epidemiologic studies. *Int J Cancer* 2009;124:670–7.
- Goldbohm RA, Hertog MG, Brants HA, van Poppel G, van den Brandt PA. Consumption of black tea and cancer risk: a prospective cohort study. *J Natl Cancer Inst* 1996;88:93–100.
- Center for Cancer Control and Information Services [NCC website]. Age-standardized gastric cancer mortality rate, in 2009. <http://ganjoho.jp/professional/statistics/statistics.html#04> [cited 3 August 2011].
- Cheng KK, Day NE. Nutrition and esophageal cancer. *Cancer Causes Control* 1996;7:33–40.
- Yu GP, Hsieh CC, Wang LY, Yu SZ, Li XL, Jin TH. Green-tea consumption and risk of stomach cancer: a population-based case-control study in Shanghai, China. *Cancer Causes Control* 1995;6:532–8.
- The council for Science and Technology, Ministry of Education, Culture, Sports, Science and Technology, Japan: *Standard Tables of*

*Food Composition in Japan*. Fifth revised and enlarged edition. Tokyo: National Printing Bureau 2005.

38. Sun CL, Yuan JM, Lee MJ, Yang CS, Gao YT, Ross RK, et al. Urinary tea polyphenols in relation to gastric and esophageal cancers: a prospective study of men in Shanghai, China. *Carcinogenesis* 2002;23:1497–503.

### Appendix

Research group members: Shoichiro Tsugane (principal investigator), Manami Inoue, Shizuka Sasazuki, Motoki Iwasaki, Tetsuya Otani (until 2006), Norie Sawada (since 2007), Taichi Shimazu (since 2007) (National Cancer

Center, Tokyo); Ichiro Tsuji (since 2004), Yoshitaka Tsubono (in 2003) (Tohoku University, Sendai); Yoshikazu Nishino (until 2006) (Miyagi Cancer Research Institute, Natori, Miyagi); Akiko Tamakoshi (since 2010) (Aichi medical University, Aichi); Keitaro Matsuo (until 2010), Hidemi Ito (since 2010) (Aichi Cancer Center, Nagoya); Kenji Wakai (Nagoya University, Nagoya); Chisato Nagata (Gifu University, Gifu); Tetsuya Mizoue (National Center for Global Health and Medicine, Tokyo); Keitaro Tanaka (Saga University, Saga).
